# Supplementary material for: Bioaerosol generation by raindrops on soil
Source: PubMed Central journal article supplement (PMC5344306; doi:10.1038/ncomms14668), 2017-03-07
Supplement: ncomms14668-s1.pdf [file ncomms14668-s1.pdf]

# Supplementary Information

1

2 Supplementary Note 1

## 3 **Estimation of bacteria transfer by raindrops from soil to air**

4 First, we used the bacteria *aerosolization efficiency* range of 0.01 % to 0.001 %, as shown in Fig.  
5 7d. It is known that the global bacteria surface density ranges from  $10^4$  cells/cm<sup>2</sup> to  $10^8$   
6 cells/cm<sup>2</sup>.<sup>1</sup> The total land area without ice is approximately  $131 \times 10^6$  km<sup>2</sup>, with 50 % of the soil  
7 containing clay.<sup>2</sup> Global average rainy days contributing 67 % of the total precipitation  
8 distributes up to 90 days.<sup>3</sup> To estimate, we used the middle range of rainy days, 45 days, similar  
9 to that of the Northwest United States.<sup>3</sup> Based on the average rainy days, we conservatively  
10 assumed that annually 45 raindrops hit on the same spot.

11

## 12 **Supplementary References**

- 13 1. Rastogi, R. *et al.* Comparative study of carbon nanotube dispersion using surfactants. *Journal of Colloid*  
14 *and Interface Science* **328**, 421-428, (2008).  
15 2. Walther, J. V. *Earth's Natural Resources*. (Jones & Bartlett Learning, 2013).  
16 3. Sun, Y., Solomon, S., Dai, A. & Portmann, R. W. How often does it rain? *Journal of Climate* **19**, 916-934,  
17 (2006).

18

19
